# Supplementary material
Source: Frontiers journal article supplement (https://www.frontiersin.org/articles/521849)
Supplement: Table_1.pdf [file Table_1.pdf]

# *HOMEX: Persuasive Technology Acceptance Model and the Moderating Effect of Culture*

## *Supplementary Material*

Table A1. Indicator reliability based on their outer loading on their respective constructs. GLO = Global model, COL = Collectivist model, IND = Individualist model

| #  | Indicator                                                                                          | Block                    | GLO  | COL  | IND  |
|----|----------------------------------------------------------------------------------------------------|--------------------------|------|------|------|
| 1  | Classical aesthetics second order indicator                                                        | Perceived Aesthetics     | 0.91 | 0.97 | 0.91 |
| 2  | The app is pleasant                                                                                | Classical Aesthetics     | 0.89 | 0.86 | 0.90 |
| 3  | The app is clean                                                                                   | Classical Aesthetics     | 0.88 | 0.93 | 0.89 |
| 4  | The app is visual                                                                                  | Classical Aesthetics     | 0.88 | 0.89 | 0.86 |
| 5  | Expressive aesthetics second order indicator                                                       | Perceived Aesthetics     | 0.90 | 0.97 | 0.89 |
| 6  | The app is sophisticated                                                                           | Expressive Aesthetics    | 0.78 | 0.89 | 0.79 |
| 7  | The app is fascinating                                                                             | Expressive Aesthetics    | 0.90 | 0.94 | 0.87 |
| 8  | The app is creative                                                                                | Expressive Aesthetics    | 0.86 | 0.85 | 0.86 |
| 9  | The app is convenient to use                                                                       | Perceived Usability      | 0.88 | 0.93 | 0.85 |
| 10 | The app is easy to use                                                                             | Perceived Usability      | 0.89 | 0.94 | 0.87 |
| 11 | The app has a clear design                                                                         | Perceived Usability      | 0.85 | 0.84 | 0.84 |
| 12 | The app has easy orientation                                                                       | Perceived Usability      | 0.86 | 0.91 | 0.87 |
| 13 | The app is credible                                                                                | Perceived Credibility    | 1.00 | 1.00 | 1.00 |
| 14 | The app will help me improve my exercise performance                                               | Perceived Usefulness     | 0.91 | 0.92 | 0.92 |
| 15 | The app will be useful in my exercise                                                              | Perceived Usefulness     | 0.91 | 0.93 | 0.91 |
| 16 | The app will help me accomplish my exercise goals easily                                           | Perceived Usefulness     | 0.90 | 0.94 | 0.89 |
| 17 | The app will make it easier to reach my exercise goals                                             | Perceived Usefulness     | 0.89 | 0.90 | 0.89 |
| 18 | The app would influence me                                                                         | Perceived Persuasiveness | 0.94 | 0.94 | 0.96 |
| 19 | The app would be convincing                                                                        | Perceived Persuasiveness | 0.89 | 0.95 | 0.89 |
| 20 | The app would be personally relevant for me                                                        | Perceived Persuasiveness | 0.90 | 0.92 | 0.91 |
| 21 | The app would make me reconsider my physical activity habits                                       | Perceived Persuasiveness | 0.91 | 0.94 | 0.89 |
| 22 | Assuming the app was deployed in real life, I predict that I will use it if I have the opportunity | Intention to Use         | 1.00 | 1.00 | 1.00 |

Table A2. Internal consistency reliability of the respective constructs based on Dillon-Goldstein's rho (DG.rho) metric. GLO = Global model, COL = Collectivist model, IND = Individualist model

| <b>Construct</b>         | <b>GLO</b> | <b>COL</b> | <b>IND</b> |
|--------------------------|------------|------------|------------|
| Perceived Aesthetics     | 0.89       | 0.94       | 0.87       |
| Classical Aesthetics     | 0.91       | 0.92       | 0.91       |
| Expressive Aesthetics    | 0.87       | 0.88       | 0.88       |
| Perceived Usability      | 0.92       | 0.95       | 0.91       |
| Perceived Credibility    | 1.00       | 1.00       | 1.00       |
| Perceived Usefulness     | 0.94       | 0.94       | 0.94       |
| Perceived Persuasiveness | 0.95       | 0.97       | 0.95       |
| Intention to Use         | 1.00       | 1.00       | 1.00       |

Table A3. Convergent validity of the respective constructs based on Average Variance Extracted (AVE) metric. GLO = Global model, COL = Collectivist model, IND = Individualist model

| <b>Construct</b>         | <b>GLO</b> | <b>COL</b> | <b>IND</b> |
|--------------------------|------------|------------|------------|
| Perceived Aesthetics     | 0.82       | 0.93       | 0.81       |
| Classical Aesthetics     | 0.78       | 0.80       | 0.78       |
| Expressive Aesthetics    | 0.72       | 0.79       | 0.70       |
| Perceived Usability      | 0.76       | 0.82       | 0.73       |
| Perceived Credibility    | 1.00       | 1.00       | 1.00       |
| Perceived Usefulness     | 0.81       | 0.85       | 0.81       |
| Perceived Persuasiveness | 0.83       | 0.88       | 0.83       |
| Intention to Use         | 1.00       | 1.00       | 1.00       |

Table A4. Global discriminant validity of the respective constructs based on crossloading metric.

Aest = Perceived Aesthetics, Class = Classical Aesthetics, Exp = Expressive Aesthetics, Usab = Perceived Usability, Cred = Perceived Credibility, Usf = Perceived Usefulness, Pers = Perceived Persuasiveness, ITU = Intention to Use

| #  | Indicator                                                                                          | Block | Aest | Class       | Exp         | Usab        | Cred        | Usf         | Pers        | ITU         |
|----|----------------------------------------------------------------------------------------------------|-------|------|-------------|-------------|-------------|-------------|-------------|-------------|-------------|
| 1  | Classical aesthetics second order indicator                                                        | Aest  | 0.91 | 0.99        | 0.64        | 0.85        | 0.66        | 0.73        | 0.63        | 0.50        |
| 2  | The app is pleasant                                                                                | Class | 0.83 | <b>0.89</b> | 0.64        | 0.76        | 0.60        | 0.69        | 0.59        | 0.46        |
| 3  | The app is clean                                                                                   | Class | 0.76 | <b>0.88</b> | 0.50        | 0.76        | 0.59        | 0.57        | 0.49        | 0.38        |
| 4  | The app is visual                                                                                  | Class | 0.78 | <b>0.88</b> | 0.54        | 0.70        | 0.52        | 0.60        | 0.50        | 0.41        |
| 5  | Expressive aesthetics second order indicator                                                       | Aest  | 0.90 | 0.63        | 0.99        | 0.61        | 0.60        | 0.73        | 0.69        | 0.57        |
| 6  | The app is sophisticated                                                                           | Exp   | 0.67 | 0.48        | <b>0.78</b> | 0.46        | 0.39        | 0.44        | 0.43        | 0.33        |
| 7  | The app is fascinating                                                                             | Exp   | 0.81 | 0.59        | <b>0.90</b> | 0.58        | 0.55        | 0.72        | 0.66        | 0.56        |
| 8  | The app is creative                                                                                | Exp   | 0.78 | 0.54        | <b>0.86</b> | 0.50        | 0.53        | 0.63        | 0.61        | 0.53        |
| 9  | The app is convenient to use                                                                       | Usab  | 0.71 | 0.70        | 0.56        | <b>0.88</b> | 0.59        | 0.69        | 0.57        | 0.47        |
| 10 | The app is easy to use                                                                             | Usab  | 0.67 | 0.70        | 0.49        | <b>0.89</b> | 0.56        | 0.65        | 0.50        | 0.39        |
| 11 | The app has a clear design                                                                         | Usab  | 0.74 | 0.80        | 0.53        | <b>0.85</b> | 0.55        | 0.65        | 0.54        | 0.42        |
| 12 | The app has easy orientation                                                                       | Usab  | 0.70 | 0.73        | 0.53        | <b>0.86</b> | 0.57        | 0.62        | 0.54        | 0.39        |
| 13 | The app is credible                                                                                | Cred  | 0.70 | 0.65        | 0.59        | 0.65        | <b>1.00</b> | 0.69        | 0.62        | 0.51        |
| 14 | The app will help me improve my exercise performance                                               | Usf   | 0.72 | 0.63        | 0.65        | 0.70        | 0.65        | <b>0.91</b> | 0.75        | 0.60        |
| 15 | The app will be useful in my exercise                                                              | Usf   | 0.75 | 0.66        | 0.68        | 0.68        | 0.64        | <b>0.91</b> | 0.74        | 0.66        |
| 16 | The app will help me accomplish my exercise goals easily                                           | Usf   | 0.70 | 0.63        | 0.61        | 0.70        | 0.61        | <b>0.90</b> | 0.77        | 0.65        |
| 17 | The app will make it easier to reach my exercise goals                                             | Usf   | 0.71 | 0.61        | 0.64        | 0.62        | 0.58        | <b>0.89</b> | 0.70        | 0.62        |
| 18 | The app would influence me                                                                         | Pers  | 0.67 | 0.53        | 0.64        | 0.55        | 0.51        | 0.76        | <b>0.94</b> | 0.72        |
| 19 | The app would be convincing                                                                        | Pers  | 0.70 | 0.59        | 0.64        | 0.63        | 0.65        | 0.74        | <b>0.89</b> | 0.66        |
| 20 | The app would be personally relevant for me                                                        | Pers  | 0.64 | 0.52        | 0.58        | 0.53        | 0.54        | 0.74        | <b>0.90</b> | 0.76        |
| 21 | The app would make me reconsider my physical activity habits                                       | Pers  | 0.65 | 0.53        | 0.61        | 0.54        | 0.55        | 0.75        | <b>0.91</b> | 0.70        |
| 22 | Assuming the app was deployed in real life, I predict that I will use it if I have the opportunity | ITU   | 0.59 | 0.48        | 0.56        | 0.48        | 0.51        | 0.70        | 0.78        | <b>1.00</b> |

Table A5. Collectivist discriminant validity of the respective constructs based on crossloading metric. Aest = Perceived Aesthetics, Class = Classical Aesthetics, Exp = Expressive Aesthetics, Usab = Perceived Usability, Cred = Perceived Credibility, Usf = Perceived Usefulness, Pers = Perceived Persuasiveness, ITU = Intention to Use

| #  | Indicator                                                                                          | Block | Aest | Class       | Exp         | Usab        | Cred        | Usf         | Pers        | ITU         |
|----|----------------------------------------------------------------------------------------------------|-------|------|-------------|-------------|-------------|-------------|-------------|-------------|-------------|
| 1  | Classical aesthetics second order indicator                                                        | Aest  | 0.97 | 0.98        | 0.84        | 0.88        | 0.79        | 0.88        | 0.90        | 0.70        |
| 2  | The app is pleasant                                                                                | Class | 0.87 | <b>0.86</b> | 0.79        | 0.80        | 0.74        | 0.80        | 0.74        | 0.61        |
| 3  | The app is clean                                                                                   | Class | 0.85 | <b>0.93</b> | 0.72        | 0.77        | 0.73        | 0.74        | 0.81        | 0.61        |
| 4  | The app is visual                                                                                  | Class | 0.80 | <b>0.89</b> | 0.67        | 0.76        | 0.63        | 0.71        | 0.78        | 0.51        |
| 5  | Expressive aesthetics second order indicator                                                       | Aest  | 0.97 | 0.84        | 0.98        | 0.88        | 0.86        | 0.91        | 0.91        | 0.75        |
| 6  | The app is sophisticated                                                                           | Exp   | 0.79 | 0.66        | <b>0.89</b> | 0.70        | 0.67        | 0.70        | 0.71        | 0.56        |
| 7  | The app is fascinating                                                                             | Exp   | 0.91 | 0.80        | <b>0.94</b> | 0.86        | 0.87        | 0.90        | 0.84        | 0.69        |
| 8  | The app is creative                                                                                | Exp   | 0.81 | 0.71        | <b>0.85</b> | 0.73        | 0.71        | 0.80        | 0.82        | 0.71        |
| 9  | The app is convenient to use                                                                       | Usab  | 0.88 | 0.76        | 0.85        | <b>0.93</b> | 0.80        | 0.84        | 0.84        | 0.65        |
| 10 | The app is easy to use                                                                             | Usab  | 0.83 | 0.75        | 0.81        | <b>0.94</b> | 0.85        | 0.85        | 0.80        | 0.60        |
| 11 | The app has a clear design                                                                         | Usab  | 0.79 | 0.84        | 0.70        | <b>0.84</b> | 0.64        | 0.76        | 0.74        | 0.55        |
| 12 | The app has easy orientation                                                                       | Usab  | 0.80 | 0.79        | 0.74        | <b>0.91</b> | 0.73        | 0.76        | 0.80        | 0.62        |
| 13 | The app is credible                                                                                | Cred  | 0.86 | 0.78        | 0.84        | 0.84        | <b>1.00</b> | 0.89        | 0.84        | 0.74        |
| 14 | The app will help me improve my exercise performance                                               | Usf   | 0.87 | 0.80        | 0.81        | 0.83        | 0.76        | <b>0.92</b> | 0.84        | 0.77        |
| 15 | The app will be useful in my exercise                                                              | Usf   | 0.87 | 0.79        | 0.87        | 0.79        | 0.82        | <b>0.93</b> | 0.85        | 0.80        |
| 16 | The app will help me accomplish my exercise goals easily                                           | Usf   | 0.89 | 0.79        | 0.84        | 0.90        | 0.83        | <b>0.94</b> | 0.89        | 0.77        |
| 17 | The app will make it easier to reach my exercise goals                                             | Usf   | 0.79 | 0.72        | 0.80        | 0.76        | 0.86        | <b>0.90</b> | 0.79        | 0.76        |
| 18 | The app would influence me                                                                         | Pers  | 0.86 | 0.79        | 0.80        | 0.79        | 0.75        | 0.84        | <b>0.94</b> | 0.77        |
| 19 | The app would be convincing                                                                        | Pers  | 0.88 | 0.79        | 0.85        | 0.86        | 0.80        | 0.86        | <b>0.95</b> | 0.72        |
| 20 | The app would be personally relevant for me                                                        | Pers  | 0.89 | 0.83        | 0.84        | 0.82        | 0.77        | 0.85        | <b>0.92</b> | 0.73        |
| 21 | The app would make me reconsider my physical activity habits                                       | Pers  | 0.88 | 0.84        | 0.84        | 0.82        | 0.82        | 0.87        | <b>0.94</b> | 0.80        |
| 22 | Assuming the app was deployed in real life, I predict that I will use it if I have the opportunity | ITU   | 0.75 | 0.64        | 0.73        | 0.67        | 0.74        | 0.84        | 0.80        | <b>1.00</b> |

Table A6. Individualist discriminant validity of the respective constructs based on crossloading metric. Aest = Perceived Aesthetics, Class = Classical Aesthetics, Exp = Expressive Aesthetics, Usab = Perceived Usability, Cred = Perceived Credibility, Usf = Perceived Usefulness, Pers = Perceived Persuasiveness, ITU = Intention to Use

| #  | Indicator                                                                                          | Block | Aest | Class       | Exp         | Usab        | Cred        | Usf         | Pers        | ITU         |
|----|----------------------------------------------------------------------------------------------------|-------|------|-------------|-------------|-------------|-------------|-------------|-------------|-------------|
| 1  | Classical aesthetics second order indicator                                                        | Aest  | 0.91 | 0.99        | 0.61        | 0.83        | 0.67        | 0.68        | 0.58        | 0.48        |
| 2  | The app is pleasant                                                                                | Class | 0.86 | <b>0.90</b> | 0.65        | 0.76        | 0.62        | 0.68        | 0.61        | 0.49        |
| 3  | The app is clean                                                                                   | Class | 0.77 | <b>0.89</b> | 0.47        | 0.77        | 0.58        | 0.53        | 0.43        | 0.35        |
| 4  | The app is visual                                                                                  | Class | 0.75 | <b>0.86</b> | 0.48        | 0.67        | 0.49        | 0.54        | 0.41        | 0.36        |
| 5  | Expressive aesthetics second order indicator                                                       | Aest  | 0.89 | 0.62        | 0.98        | 0.58        | 0.58        | 0.66        | 0.63        | 0.49        |
| 6  | The app is sophisticated                                                                           | Exp   | 0.66 | 0.43        | <b>0.79</b> | 0.35        | 0.39        | 0.42        | 0.43        | 0.33        |
| 7  | The app is fascinating                                                                             | Exp   | 0.76 | 0.53        | <b>0.87</b> | 0.53        | 0.48        | 0.66        | 0.64        | 0.50        |
| 8  | The app is creative                                                                                | Exp   | 0.78 | 0.56        | <b>0.86</b> | 0.52        | 0.53        | 0.55        | 0.51        | 0.40        |
| 9  | The app is convenient to use                                                                       | Usab  | 0.67 | 0.69        | 0.50        | <b>0.85</b> | 0.54        | 0.66        | 0.53        | 0.48        |
| 10 | The app is easy to use                                                                             | Usab  | 0.63 | 0.66        | 0.44        | <b>0.87</b> | 0.48        | 0.58        | 0.43        | 0.37        |
| 11 | The app has a clear design                                                                         | Usab  | 0.72 | 0.76        | 0.51        | <b>0.84</b> | 0.57        | 0.62        | 0.52        | 0.43        |
| 12 | The app has easy orientation                                                                       | Usab  | 0.67 | 0.73        | 0.47        | <b>0.87</b> | 0.54        | 0.59        | 0.46        | 0.35        |
| 13 | The app is credible                                                                                | Cred  | 0.70 | 0.64        | 0.56        | 0.63        | <b>1.00</b> | 0.64        | 0.59        | 0.47        |
| 14 | The app will help me improve my exercise performance.                                              | Usf   | 0.69 | 0.57        | 0.64        | 0.67        | 0.59        | <b>0.92</b> | 0.74        | 0.59        |
| 15 | The app will be useful in my exercise                                                              | Usf   | 0.69 | 0.61        | 0.60        | 0.64        | 0.65        | <b>0.91</b> | 0.73        | 0.66        |
| 16 | The app will help me accomplish my exercise goals easily                                           | Usf   | 0.64 | 0.60        | 0.54        | 0.65        | 0.52        | <b>0.89</b> | 0.75        | 0.63        |
| 17 | The app will make it easier to reach my exercise goals                                             | Usf   | 0.67 | 0.61        | 0.56        | 0.63        | 0.55        | <b>0.89</b> | 0.68        | 0.56        |
| 18 | The app would influence me                                                                         | Pers  | 0.62 | 0.50        | 0.60        | 0.52        | 0.49        | 0.76        | <b>0.95</b> | 0.71        |
| 19 | The app would be convincing                                                                        | Pers  | 0.67 | 0.57        | 0.61        | 0.59        | 0.65        | 0.73        | <b>0.89</b> | 0.68        |
| 20 | The app would be personally relevant for me                                                        | Pers  | 0.59 | 0.48        | 0.55        | 0.49        | 0.51        | 0.74        | <b>0.91</b> | 0.77        |
| 21 | The app would make me reconsider my physical activity habits                                       | Pers  | 0.57 | 0.47        | 0.54        | 0.48        | 0.49        | 0.71        | <b>0.89</b> | 0.66        |
| 22 | Assuming the app was deployed in real life, I predict that I will use it if I have the opportunity | ITU   | 0.54 | 0.46        | 0.49        | 0.48        | 0.47        | 0.68        | 0.77        | <b>1.00</b> |
